# Supplementary material for: Green Synthesis of a Reversible “ON-OFF-ON” Fluorescent sensor for Fe3+ Using Licorice-Derived N-Doped Carbon Dots
Source: Research Square preprint supplement (doi:10.21203/rs.3.rs-8105416/v1), 2025-11-25
Supplement: Supplementary file 1 [file a82c31fa910d387f76bfb490.docx]

**Green Synthesis of a Reversible “ON-OFF-ON” Fluorescent sensor for Fe3+ Using Licorice-Derived N-Doped Carbon Dots**

Zubair Akrama, Anam Arshada, Mohsin Tehseenb, Muhammad Mehdic, Ali Razaa, Yulan Shia, Nan Wanga,d,*, Sajida Noureenb*, Feng Yua,d,*

a *Key Laboratory for Green Processing of Chemical Engineering of Xinjiang Bingtuan, School of Chemistry and Chemical Engineering, Shihezi University, Shihezi 832003, China.*

b *Materials Chemistry Laboratory, Institute of Chemistry, The Islamia University of Bahawalpur, Baghdad-ul-Jadeed Campus Bahawalpur 63100, Pakistan.*

c *College of Chemistry & Pharmacy, Northwest A&F University, Yangling, Shaanxi 712100, China.*

*d Carbon Neutralization and Environmental Catalytic Technology Laboratory, Bingtuan Industrial Technology Research Institute, Shihezi University, Shihezi 832003, China.*

* Corresponding authors.

E-mail address: [nanwangsearl@outlook.com](mailto:nanwangsearl@outlook.com) (N. Wang), [yufeng05@mail.ipc.ac.cn](mailto:yufeng05@mail.ipc.ac.cn) (F. Yu), [sajida.noureen@iub.edu.pk](mailto:sajida.noureen@iub.edu.pk) (S. Noureen)

**The Images of N-CQDs under UV light in the presence and absence of analytes**

***Figure S1***. Images of the N-CQD aqueous solution (0.5 mg mL-1): under 365 nm UV light in the absence of analytes (bright blue fluorescence) (a), and under 365 nm UV light in the presence of analytes (quenched bright blue fluorescence in the presence of Fe3+) (b) confirming the photoluminescent property of N-CQDs.

**Figure of photostability under prolonged UV irradiation**


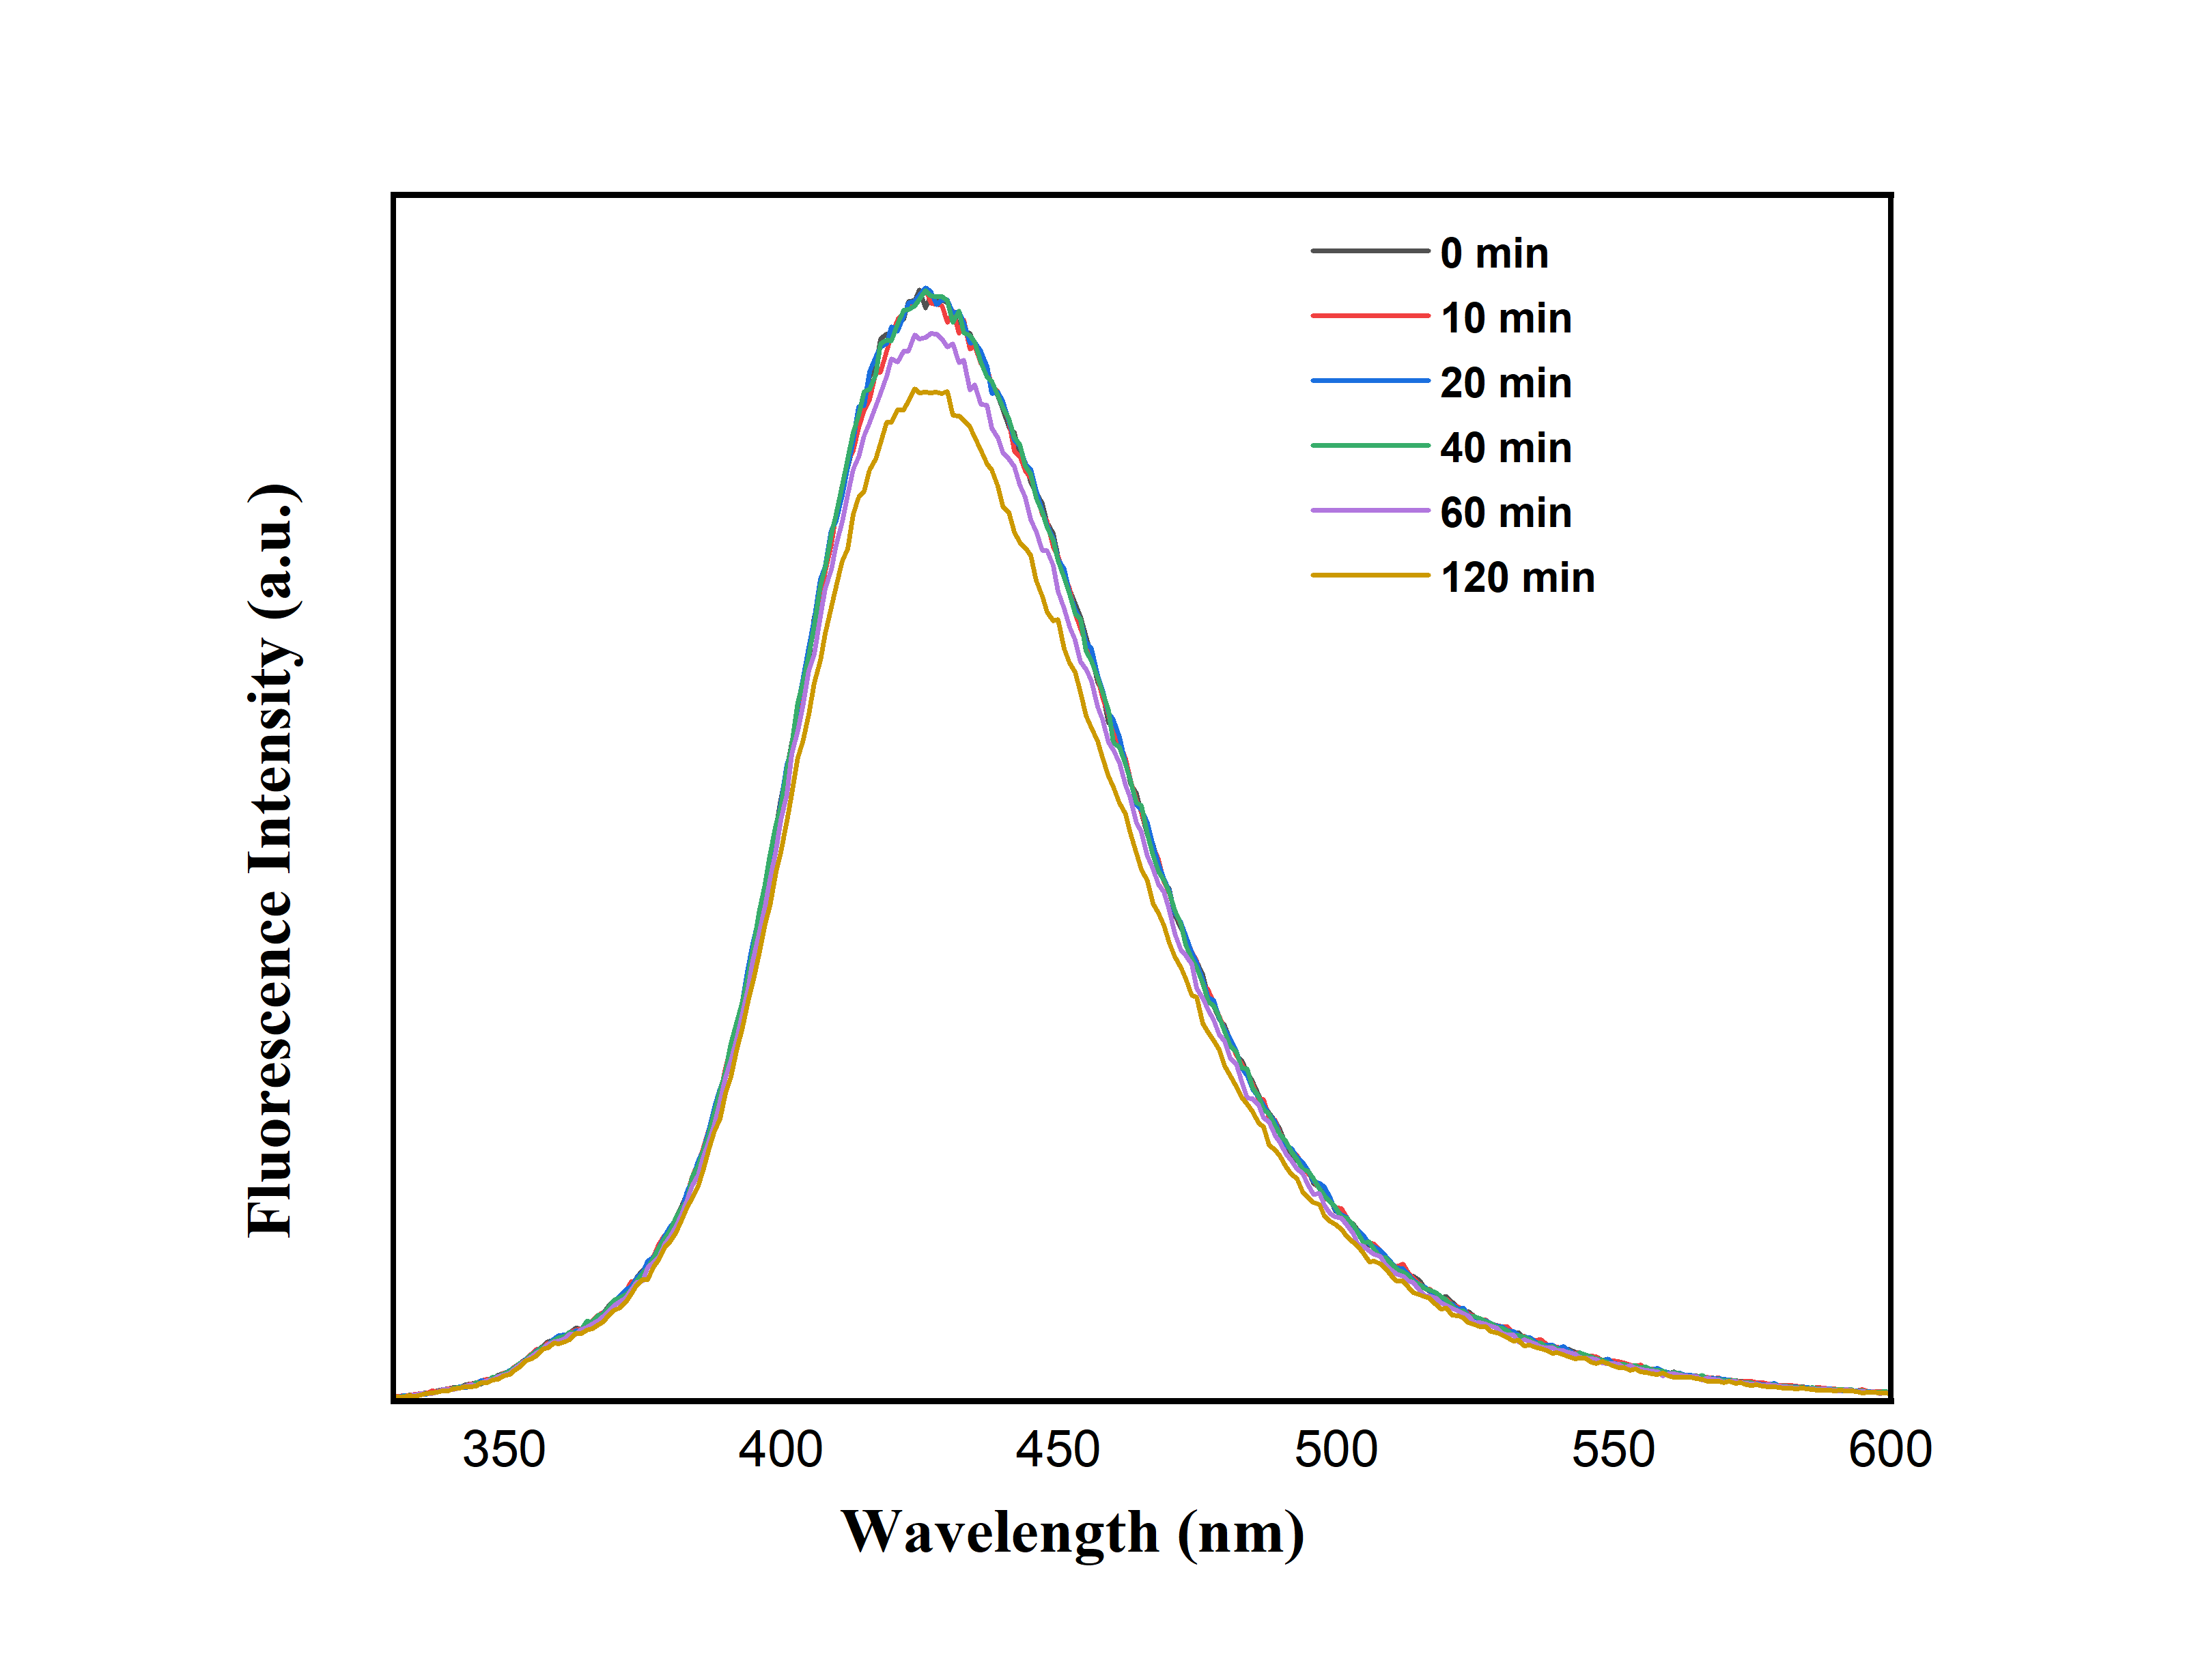


***Figure S2.*** N-CQDs exhibited excellent photostability under prolonged UV irradiation.

The N-CQDs also exhibited excellent photostability under prolonged UV irradiation (365 nm, 10 W): after 120 mins, they retained 91% of initial fluorescence intensity **(Figure S2)**. This ensures reliable signal acquisition during fluorescence measurements.
